# Supplementary material for: Trifunctional modification of individual bacterial cells for magnet-assisted bioanodes with high performance in microbial fuel cells
Source: Royal Society of Chemistry journal article supplement (doi:10.1039/d0ta08574j), 2020-01-01
Supplement: d0ta08574j1.pdf [file d0ta08574j1.pdf]

Supporting Information

**Trifunctional modification of individual bacterial cells for magnet-assisted bioanode with high performance in microbial fuel cells**

Yujing Jiang,<sup>a</sup> Pingping Li,<sup>a</sup> Yuanyuan Wang,<sup>a</sup> Li-Ping Jiang,<sup>a</sup> Rong-Bin Song,<sup>\*ab</sup>  
Jian-Rong Zhang<sup>\*ac</sup> and Jun-Jie Zhu<sup>\*a</sup>

<sup>a</sup> State Key Laboratory of Analytical Chemistry for Life Science, School of Chemistry and Chemical Engineering, Nanjing University, Nanjing 210023, P.R. China

E-mail: rbsong@nju.edu.cn; jrzhang@nju.edu.cn; jjzhu@nju.edu.cn

<sup>b</sup> School of Ecology and Environment, Zhengzhou University, Zhengzhou 450001, P.R. China

E-mail: rbsong@zzu.edu.cn

<sup>c</sup> School of Chemistry and Life Science, Nanjing University Jingling College, Nanjing 210089, P.R. China

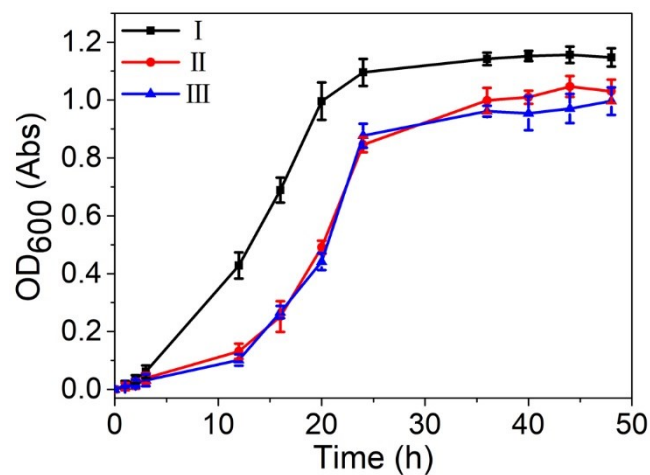

**Fig. S1** Growth curves of native *S. oneidensis* MR-1 (curve I), *S. oneidensis* MR-1@Au (curve II) and *S. oneidensis* MR-1@Au@Fe<sub>3</sub>O<sub>4</sub> (curve III). Error bars represent standard error (s.e.) determined by three independent experiments.

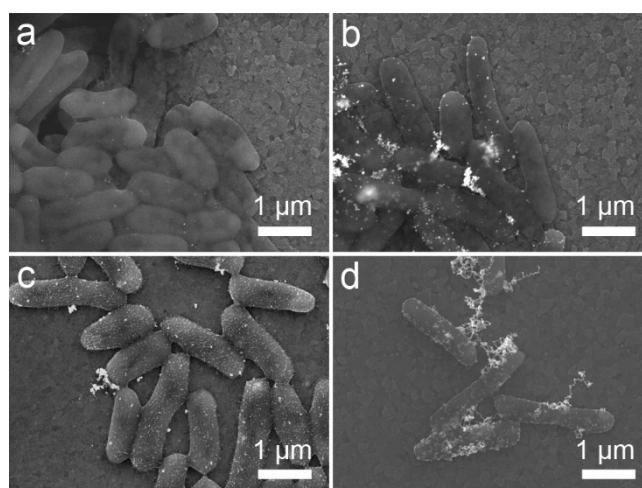

**Fig. S2** SEM images of *S. oneidensis* MR-1@Au with different Au content. (a) 0.5 mM L<sup>-1</sup>, (b) 1 mM L<sup>-1</sup>, (c) 1.5 mM L<sup>-1</sup>, (d) 2 mM L<sup>-1</sup>.

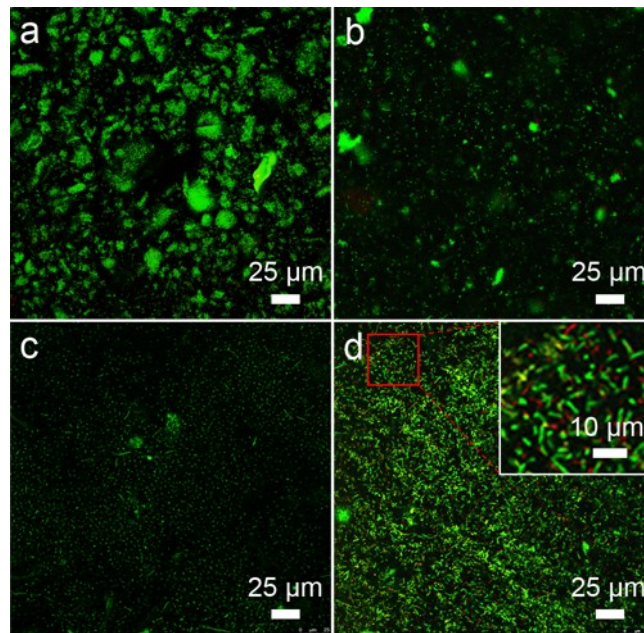

**Fig. S3** CLSM images of *S. oneidensis* MR-1@Au with different Au content. (a) 0.5 mM L<sup>-1</sup>, (b) 1 mM L<sup>-1</sup>, (c) 1.5 mM L<sup>-1</sup>, (d) 2 mM L<sup>-1</sup>. The inset in image d is the corresponding high-magnification CLSM image.

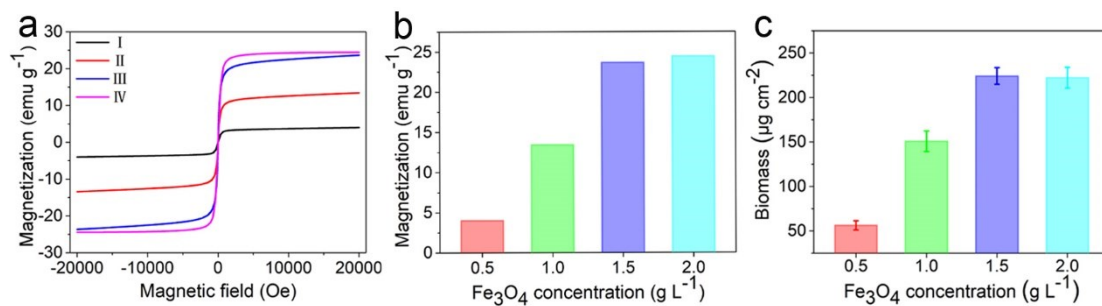

**Fig. S4** The hysteresis loops (a), saturation magnetization (b) and biomass (c) of *S. oneidensis* MR-1@Au@Fe<sub>3</sub>O<sub>4</sub> at different Fe<sub>3</sub>O<sub>4</sub> concentration (curve I, 0.5 g L<sup>-1</sup>; curve II, 1 g L<sup>-1</sup>; curve III, 1.5 g L<sup>-1</sup>; curve IV, 2 g L<sup>-1</sup>).

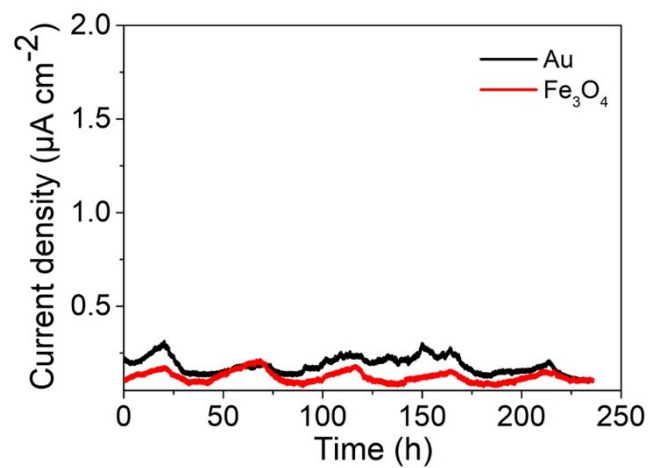

**Fig. S5** Time profile of electricity generation of magnetic substrate electrode with Au and  $\text{Fe}_3\text{O}_4$ .

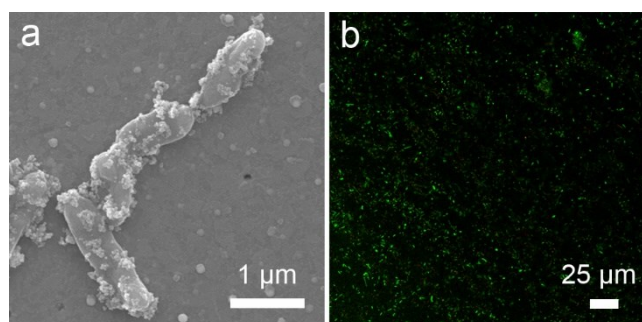

**Fig. S6** SEM image (a) and CLSM image (b) of *S. oneidensis* MR-1@ $\text{Fe}_3\text{O}_4$  after modification.

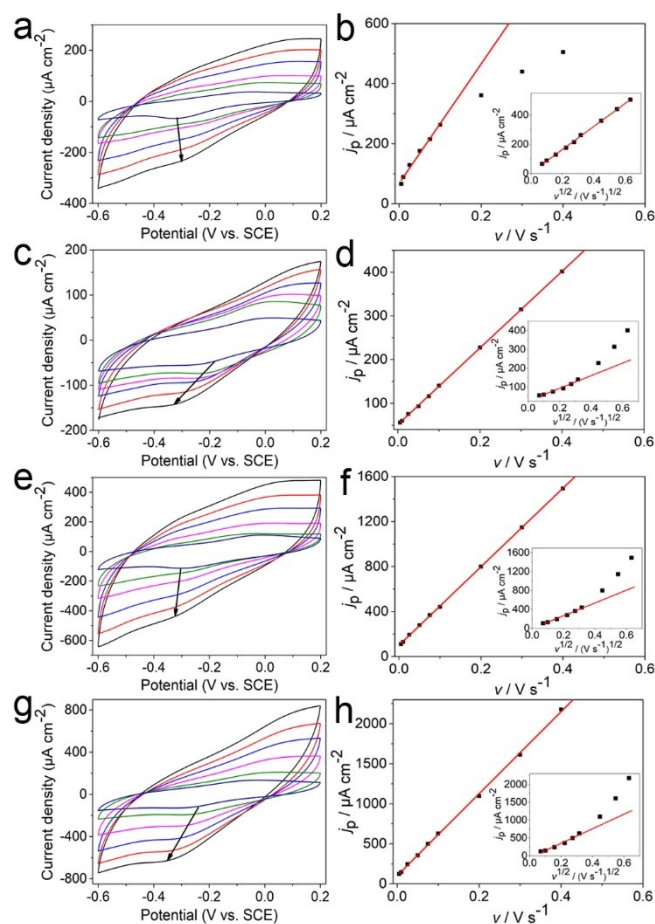

**Fig. S7** Cyclic voltammograms of *S. oneidensis* MR-1 (a), *S. oneidensis* MR-1@Au (c), *S. oneidensis* MR-1@Fe<sub>3</sub>O<sub>4</sub> (e) and *S. oneidensis* MR-1@Au@Fe<sub>3</sub>O<sub>4</sub> (g) biofilms at different scan rates (arrows showed scan rates at 5, 10, 25, 50, 75 and 100  $\text{mV s}^{-1}$ , respectively). Dependence of reduction current density ( $j_p$ ) versus scan rate ( $\nu$ ) on *S. oneidensis* MR-1 (b), *S. oneidensis* MR-1@Au (d), *S. oneidensis* MR-1@Fe<sub>3</sub>O<sub>4</sub> (f) and *S. oneidensis* MR-1@Au@Fe<sub>3</sub>O<sub>4</sub> (h) biofilms, separately; Inset: linear dependence of  $j_p$  versus  $\nu^{1/2}$ .

**Table S1.** Comparison of the performance of previous MFCs using Au, Fe<sub>3</sub>O<sub>4</sub> and their corresponding hybrids as anodes, as well as functionalized bacterial cells as bioanode.

| Electrode substrates   | Anode materials                                                | Microbe type                                     | Power density (mW m <sup>-2</sup> ) | Ref.             |
|------------------------|----------------------------------------------------------------|--------------------------------------------------|-------------------------------------|------------------|
| Graphite felt          | Fe <sub>3</sub> O <sub>4</sub>                                 | Mixed bacteria                                   | 18.28                               | 1                |
| Carbon felt            | MWCNT-Au-Pt/<br>osmium redox polymer                           | <i>Gluconobacter oxydans</i>                     | 32.1                                | 2                |
| Carbon cloth           | BioAu/MWCNT                                                    | Mixed bacteria                                   | 178.34<br>± 4.79                    | 3                |
| Carbon paper           | Au                                                             | Mixed bacteria                                   | 461.6                               | 4                |
| Stainless steel mesh   | Activated carbon/<br>Fe <sub>3</sub> O <sub>4</sub>            | Mixed bacteria                                   | 809 ± 5                             | 5                |
| Carbon paper           | Fe <sub>3</sub> O <sub>4</sub> /CNT                            | <i>Escherichia coli</i>                          | 830                                 | 6                |
| Carbon paper           | Fe <sub>3</sub> O <sub>4</sub> /CNT                            | <i>Escherichia coli</i>                          | 865                                 | 7                |
| Carbon paper           | Graphene/Fe <sub>3</sub> O <sub>4</sub>                        | <i>Shewanella oneidensis</i>                     | 891                                 | 8                |
| Carbon paper           | Au                                                             | Mixed bacteria                                   | 990                                 | 9                |
| Stainless steel plates | Fe <sub>3</sub> O <sub>4</sub> /Fe <sub>2</sub> O <sub>3</sub> | <i>Geobacter sulfurreducens</i>                  | 1500                                | 10               |
|                        |                                                                | <b>Polydopamine-coated</b>                       |                                     |                  |
| Carbon felt            | /                                                              | <i>Shewanella xiamenensis</i>                    | 452.8                               | 11               |
|                        |                                                                | <b>Polypyrrole-coated</b>                        |                                     |                  |
| Carbon cloth           | /                                                              | <i>Shewanella oneidensis</i>                     | 1479                                | 12               |
|                        |                                                                | <b>Carbon dots-coated</b>                        |                                     |                  |
| Carbon felt            | /                                                              | <i>Shewanella oneidensis</i>                     | 1697.9                              | 13               |
|                        |                                                                | <b>Au and Fe<sub>3</sub>O<sub>4</sub>-coated</b> |                                     |                  |
| <b>Carbon cloth</b>    | /                                                              | <i>Shewanella oneidensis</i>                     | <b>1792</b>                         | <b>This work</b> |

## References

1. B. Yu, Y. Li and L. Feng, *J. Hazard. Mater.*, 2019, **377**, 70-77.
2. S. Aslan, P. Ó Conghaile, D. Leech, L. Gorton, S. Timur and U. Anik, *ChemistrySelect*, 2017, **2**, 12034-12040.
3. X. Wu, X. Xiong, G. Owens, G. Brunetti, J. Zhou, X. Yong, X. Xie, L. Zhang, P. Wei and H. Jia, *Bioresour. Technol.*, 2018, **270**, 11-19.
4. F. A. a. Alatraktchi, Y. Zhang and I. Angelidaki, *Appl. Energy*, 2014, **116**, 216-222.
5. X. Peng, H. Yu, X. Wang, Q. Zhou, S. Zhang, L. Geng, J. Sun and Z. Cai, *Bioresour. Technol.*, 2012, **121**, 450-453.
6. I. H. Park, M. Christy, P. Kim and K. S. Nahm, *Biosens. Bioelectron.*, 2014, **58**, 75-80.
7. I. H. Park, P. Kim, G. Gnana kumar and K. S. Nahm, *Appl. Biochem. Biotechnol.*, 2016, **179**, 1170-1183.
8. R.-B. Song, C.-e. Zhao, P.-P. Gai, D. Guo, L.-P. Jiang, Q. Zhang, J.-R. Zhang and J.-J. Zhu, *Chem. Asian J.*, 2017, **12**, 308-313.
9. S. Mateo, P. Cañizares, M. A. Rodrigo and F. J. Fernandez-Morales, *Appl. Energy*, 2018, **225**, 52-59.
10. X. Long, X. Cao, C. Wang, S. Liu and X. Li, *J. Electroanal. Chem.*, 2019, **855**, 113497.
11. S.-R. Liu, L.-F. Cai, L.-Y. Wang, X.-F. Yi, Y.-J. Peng, N. He, X. Wu and Y.-P. Wang, *Chem. Commun.*, 2019, **55**, 10535-10538.
12. R.-B. Song, Y. Wu, Z.-Q. Lin, J. Xie, C. H. Tan, J. S. C. Loo, B. Cao, J.-R. Zhang, J.-J. Zhu and Q. Zhang, *Angew. Chem. Int. Ed.*, 2017, **56**, 10516-10520.
13. D. Guo, H.-F. Wei, R.-B. Song, J. Fu, X. Lu, R. Jelinek, Q. Min, J.-R. Zhang, Q. Zhang and J.-J. Zhu, *Nano Energy*, 2019, **63**, 103875.
